# Supplementary material
Source: PubMed Central journal article supplement (PMC5553578)
Supplement: blood779447-suppl1.pdf [file blood779447-suppl1.pdf]

## **Supplementary Materials**

Figure S1. Patient Sample Availability and Analysis Disposition

Figure S2. Analysis of 2-HG and mIDH2 Variant Allele Frequency

Figure S3. mIDH2 Variant Allele Frequency and Response

Figure S4. VAF of Co-occurring Mutations in Patients with Low mIDH2

Figure S5. Mature and Immature Cell Populations from Bone Marrow in Non-Responding Patients

Figure S6. Co-occurring Mutation Frequency and Clonality vs Response

Table S1. Patient Baseline Characteristics in all rrAML Patients from Phase 1 Portion of Study AG-221-C-001 and Patient Subgroups Analyzed.

Table S2. Multi-parameter Flow Cytometry (MFC) Ten-“color” Panel.

Table S3. Antibody List used for Hematopoietic Stem, Progenitor, and Mature Cell Population Immunophenotyping

Table S4. Detection of IDH2 Mutation in Peripheral Blood Neutrophils and Monocytes in Patients Treated with Enasidenib

Table S5. Association of Known Somatic Mutations Identified by FoundationOne® Heme Panel with Response to Enasidenib

**Figure S1**

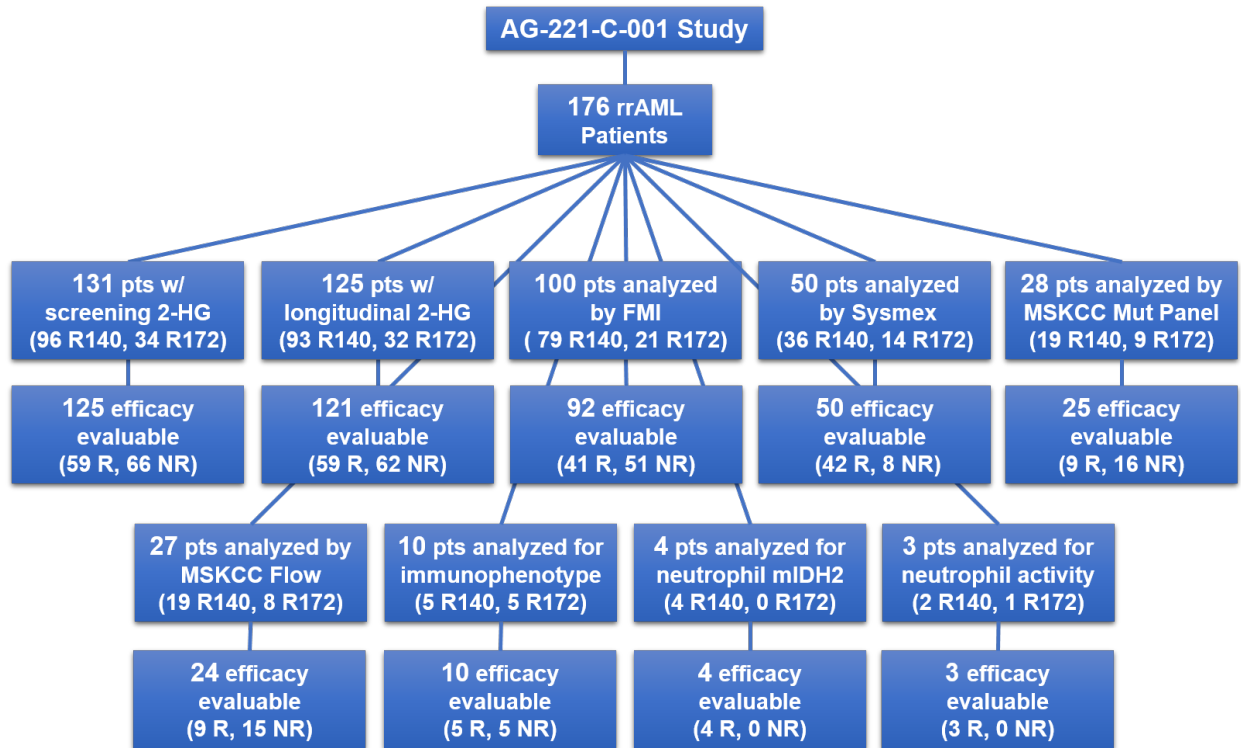

**Figure S1: Patient Sample Availability and Analysis Disposition**

Patient sample disposition indicating of 176 rrAML patients from the AG-221-C-001 study; i.e., the sample availability for each assay. Of available samples, only a subset had clinical efficacy data, defined as those patients who received enasidenib and an investigator-assessed clinical response was captured from at least one time-point during treatment. Number of samples from patients with R140 vs R172 *mIDH2* and from patients achieving a response (R) vs no response (NR) (as defined in Figure 1) are indicated. rrAML, relapsed/refractory acute myeloid leukemia, FMI, Foundation Medicine, Inc. FoundationOne® Heme Assay. MSKCC, Memorial Sloan Kettering Cancer Center.

**Figure S2**

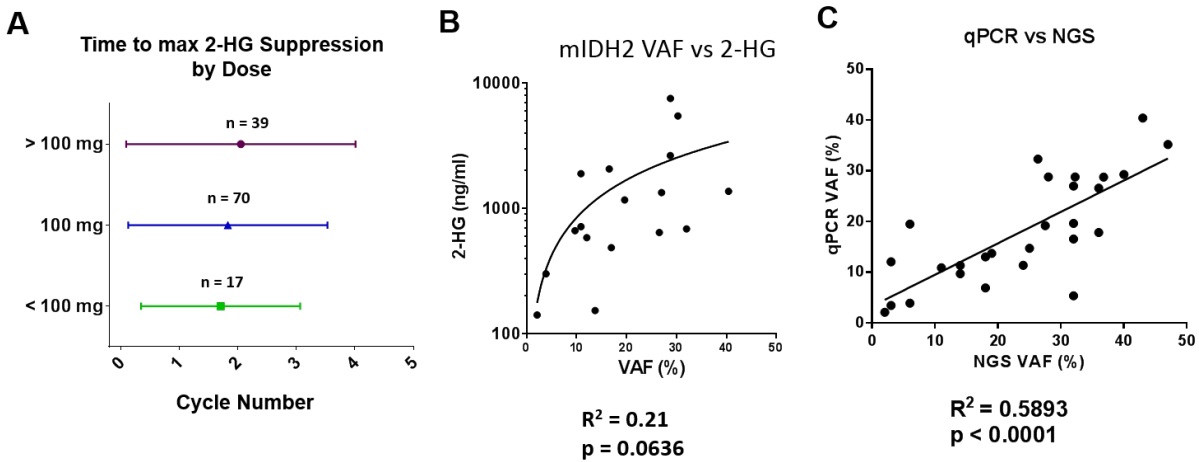

**Figure S2. Analysis of 2-HG and mIDH2 Variant Allele Frequency**

- Whisker plot indicating mean and standard deviation of cycle to maximum 2-HG suppression (Max 2-HG) stratified by patients dosed with <100mg, 100mg, or >100mg enasidenib daily.
- Scatter plot and regression analysis of mIDH2 variant allele frequency (VAF) in patient samples at screening analyzed by Sysmex OncoBeam digital PCR assay with levels of 2-HG in plasma in the same patient (n=17).
- Scatter plot and regression analysis of mIDH2 VAF in patient samples when VAF was measured in the same patient at the same time point by both an NGS panel (either FoundationOne® Heme, n=26, or MSKCC panel, n=3, as discussed in Methods) and Sysmex OncoBeam digital PCR assay.

**Figure S3**

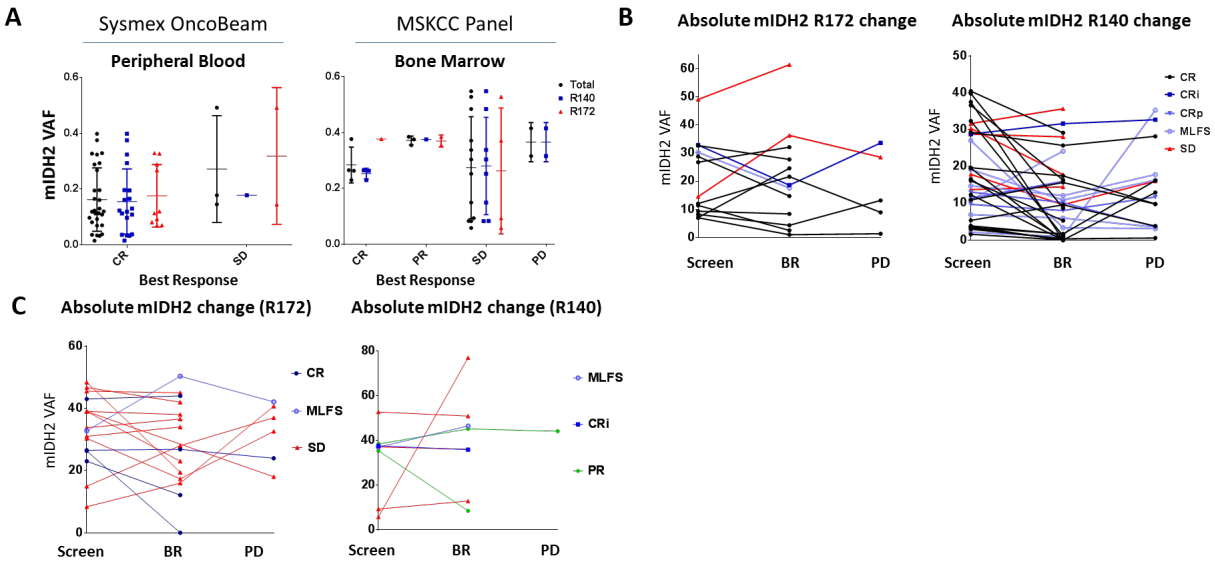

**Figure S3. mIDH2 Variant Allele Frequency and Response**

- A. Dot plot of *mIDH2* VAF in patient samples measured by Sysmex digital PCR (left) or Memorial Sloan Kettering Cancer Center (MSKCC) mutational panel (right) at screening. Measurements were separated by best response (BR) achieved by the patient (CR, CRp, CRi, or MLFS) and *mIDH2* status (red = R140, blue = R172, black = combined).
- B. Scatter plots of *mIDH2* VAF level measured by Sysmex digital PCR in R172 (left) and R140 (right) *mIDH2* patients. Lines indicate changes in *mIDH2* levels in individual patients from screening to first achievement of BR to disease progression (PD, if available). Black lines indicate patients' BR of CR, blue lines indicate BR of CRi, CRp, or MLFS, and red lines indicate BR of SD (SD patients' samples were analyzed at Cycle 3 Day 1).
- C. Scatter plots of *mIDH2* VAF level measured by NGS panels in *mIDH2* R172 (left) and R140 (right) patients. Lines indicate changes in *mIDH2* levels in individual patients from screening to first achievement of BR and then to PD (if available). Black lines indicate patients' BR of CR, blue lines indicate BR of CRi or MLFS, green lines indicate BR of PR, and red lines indicate BR of SD (SD patients' samples were analyzed at Cycle 3 Day 1).

Figure S4

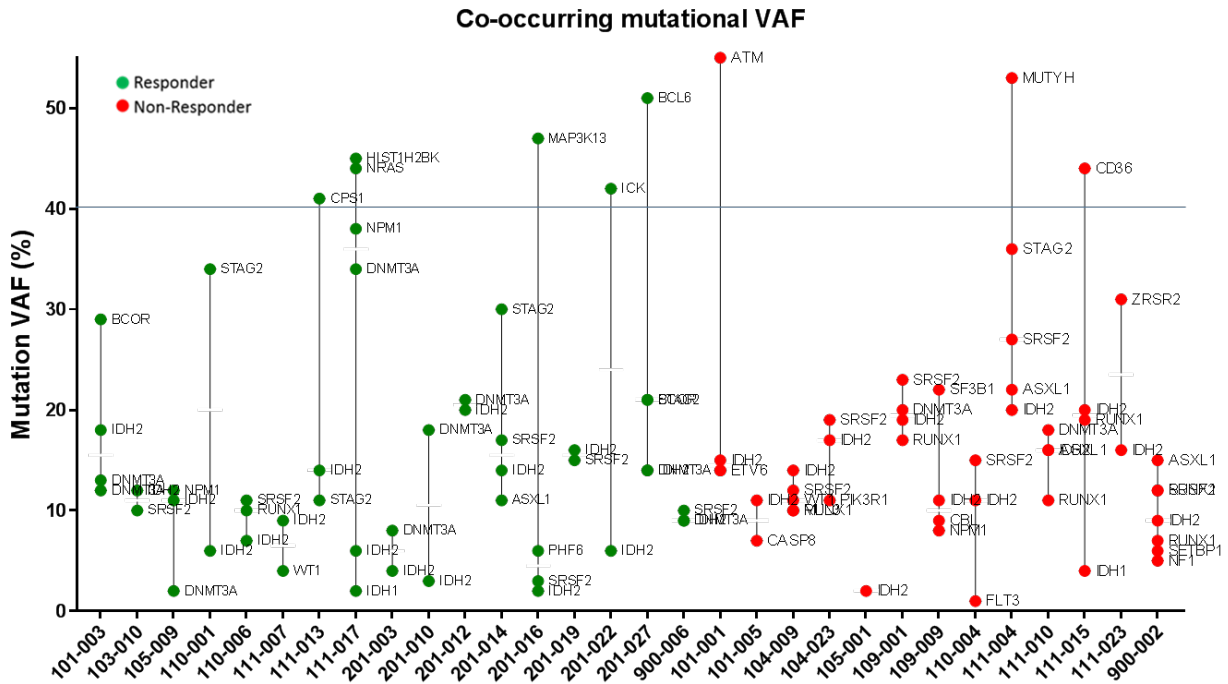

Figure S4: VAF of co-occurring mutations in patients with low mIDH2

Co-mutational variant allele frequency (VAF) measured by FoundationOne® Heme panel in individual patients with subclonal mIDH2 (VAF <20%). Responding patients (CR, CRi, CRp, MLFS, or PR) in green, non-responding patients (SD or PD) in red.

Figure S5

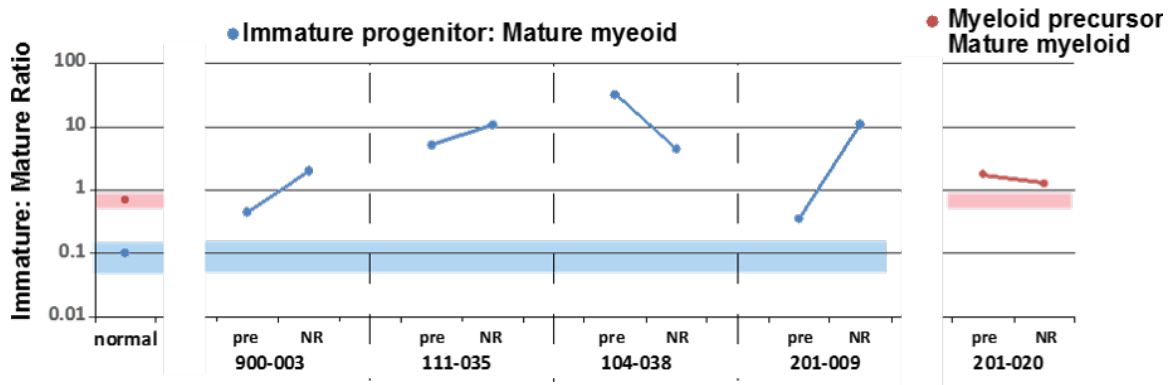

**Figure S5. Mature and Immature Cell Populations from Bone Marrow in Non-Responding Patients**

Graph showing ratio of immature to mature cell populations from bone marrow: The average ratios of myeloid progenitor or myeloid precursors to mature myeloid cells in bone marrow from normal donors (n=12) are shown. Colored bars represent the 95% confidence interval. The same analysis was applied to samples from four non-responding patients with expanded leukemic myeloid progenitors and one patient (201-020) who had expanded leukemic myeloid precursors.



that were not part of the Papaemmanuil, et al. dataset or FoundationOne® Heme panel were removed. Fisher Exact Test was used to compare gene counts between datasets. \* indicates significant enrichment of gene in either data set ( $p\text{-value} \leq 0.05$ ).

- B. Comparison of co-occurring mutation frequency in AG-221-C-001 (red) vs same co-occurring mutations in all 130 cases of de novo AML from Papaemmanuil, et al that were *mIDH2* positive (blue).<sup>13</sup> Genes that were not part of the ULM dataset or FoundationOne® Heme panel were removed. Fisher Exact Test was used to compare gene counts between datasets. \* indicates significant enrichment of gene in either data set ( $p\text{-value} \leq 0.05$ ).
- C. Histogram of mutation frequency in genes found by FoundationOne® Heme panel in R140 *mIDH2* patients.
- D. Histogram of mutation frequency in genes found by FoundationOne® Heme panel in R172 *mIDH2* patients.
- E. Number of mutations found per patient separated by patients with *mIDH2* R140 vs R172. Hashes represent mean with standard deviation,  $p\text{-value}$  from student's t-test.



**Table S1. Patient baseline characteristics in all relapsed/refractory AML patients from the AG221-C-001 trial and patient subgroup analyzed.**

|                                                                          | <b>FoundationOne®<br/>Patients<br/>n=100</b> | <b>Sysmex mIDH2<br/>VAF Patients<br/>n=50</b> | <b>2-HG Patients<br/>N= 125</b> | <b>All R/R AML<br/>Patients<br/>n=176</b> |
|--------------------------------------------------------------------------|----------------------------------------------|-----------------------------------------------|---------------------------------|-------------------------------------------|
| <b>ORR (%)</b>                                                           | 41.0                                         | 84.0                                          | 47.2                            | 40.3                                      |
| <b>CR (%)</b>                                                            | 19.0                                         | 60.0                                          | 20.8                            | 19.3                                      |
| <b>Median Age,<br/>years</b>                                             | 65.7                                         | 67.6                                          | 65.2                            | 65.2                                      |
| <b>Sex M/F (%)</b>                                                       | 51.0/49.0                                    | 36.0/64.0                                     | 52.0/48.0                       | 51.1/48.9                                 |
| <b>Gene Mutation<br/>(%):<br/>R140/R172</b>                              | 79.0/21.0                                    | 74.0/26.0                                     | 74.4/26.6                       | 73.9/25.6                                 |
| <b>No. of Prior<br/>Anticancer<br/>therapies (%):<br/>1/2/3/4/&gt;=5</b> | 46.0/23.0/16.0/<br>11.0/4.0                  | 56.0/26.0/6.0/<br>10.0/2.0                    | 50.4/22.4/12.8/<br>10.4/4.0     | 46.6/26.1/14.2/<br>8.5/4.5                |
| <b>Prior<br/>Transplant (%)</b>                                          | 14.0                                         | 16.0                                          | 14.4                            | 13.6                                      |
| <b>Mean Bone<br/>Marrow Blast<br/>(%)</b>                                | 49.9                                         | 36.4                                          | 47.1                            | 49.4                                      |
| <b>Mean ANC<br/>(x10<sup>9</sup>/L)</b>                                  | 1.5                                          | 1.6                                           | 1.3                             | 1.3                                       |
| <b>Prior MDS (%)</b>                                                     | 16.0                                         | 10.0                                          | 16.0                            | 17.0                                      |

Overall Response Rate (ORR) and Complete Remission (CR) rate and baseline characteristics, including age, sex (male/female), *IDH2* mutation subtype, number of prior anticancer therapies, patients who have received a transplant, baseline bone marrow blast percentage, mean absolute neutrophil count (ANC) and patients with prior diagnosis of MDS in the rrAML cohort in the AG-221-C-001 and in patient subgroups analyzed by FoundationOne® Heme mutation panel, Sysmex mIDH2 VAF digital PCR, and 2-HG assay.

**Table S2. Multi-parameter Flow Cytometry (MFC) Ten-“Color” Panel.**

| Myeloid tube 1     | Myeloid tube 2    | Myeloid tube 3    |
|--------------------|-------------------|-------------------|
| CD15 FITC          | CD64 FITC         | CD7 BB515         |
| CD33 PE            | CD123 PE          | CD56 PE           |
| CD117 PC5          | CD14 PC5          | CD5 PerCP-Cy5.5   |
| CD13 PE-CY7        | CD13 PE-CY7       | CD33 PE-CY7       |
| CD34 APC           | CD34 APC          | CD34 APC          |
| CD71 APC ALEXA700  | CD16 APC ALEXA700 | CD4 APC-ALEXA700  |
| CD38 APC ALEXA 750 | CD38 APC ALEXA750 | CD38 APC-ALEXA750 |
| HLA-DR PAC BLUE    | HLA-DR PAC BLUE   | CD2 BV421         |
| CD45 V500C         | CD45 V500C        | CD45 V500c        |
| CD19 BV605         | CD11b BV605       | CD25 BV605        |

**Table S3. Antibody List Used for Hematopoietic Stem, Progenitor, and Mature Cell Population Immunophenotyping**

| Antigen                                       | Clone        | Fluorochrome  | Source          |
|-----------------------------------------------|--------------|---------------|-----------------|
| CD10                                          | eBIOCB-CALLA | None          | Ebioscience, UK |
| CD117                                         | 104D2        | PE            | Biolegend, UK   |
| CD11b                                         | ICRF44       | APC           | Ebioscience, UK |
| CD19                                          | HIB19        | none          | Ebioscience, UK |
| CD2                                           | RPA-2.10     | none          | Ebioscience, UK |
| CD20                                          | 2H7          | none          | Ebioscience, UK |
| CD235a                                        | HIR2         | none          | Ebioscience, UK |
| CD3                                           | HIT3a        | none          | Ebioscience, UK |
| CD34                                          | 561          | BV421         | Biolegend, UK   |
| CD4                                           | RPA-T4       | none          | Ebioscience, UK |
| CD8a                                          | RPA-T8       | none          | Ebioscience, UK |
| goat F(ab') <sub>2</sub> anti-mouse secondary |              | QDOT605       | Invitrogen      |
| Streptavidin                                  |              | APC EFluor780 | Ebioscience, UK |

**Table S4. Detection of *IDH2* Mutation in Peripheral Blood Neutrophils and Monocytes in Four Patients Treated with Enasidenib**

| <b>Patient</b> | <b>Time point</b> | <b>Response</b> | <b>Mature cells analysed</b> | <b><i>mIDH2</i> detected</b> |
|----------------|-------------------|-----------------|------------------------------|------------------------------|
| 201-001        | C1D8              | NA              | Neutrophil-enriched          | yes                          |
| 201-001        | C2D1              | MLFS            | Neutrophil-enriched          | yes                          |
| 201-001        | C3D1              | CRi             | Neutrophil-enriched          | yes                          |
| 201-001        | C4D1              | CRi             | Neutrophil-enriched          | yes                          |
| 201-001        | C4D8              | NA              | Neutrophil-enriched          | yes                          |
| -              | -                 | -               | -                            | -                            |
| 201-002        | pre-treatment     | NA              | Neutrophil-enriched          | yes                          |
| 201-002        | C1D8              | NA              | Neutrophil-enriched          | yes                          |
| 201-002        | C1D15             | CR              | Neutrophil-enriched          | yes                          |
| 201-002        | C1D18             | CR              | Neutrophil-enriched          | yes                          |
| 201-002        | C1D25             | CR              | Neutrophil-enriched          | yes                          |
| 201-002        | C2D1              | CR              | Neutrophil-enriched          | yes                          |
| 201-002        | C2D15             | CR              | Neutrophil-enriched          | yes                          |
| 201-002        | C2D22             | CR              | Neutrophil-enriched          | yes                          |
| 201-002        | C3D1              | CR              | Neutrophil-enriched          | yes                          |
| 201-002        | C3D4              | CR              | Neutrophil-enriched          | yes                          |
| 201-002        | C3D8              | CR              | Neutrophil-enriched          | yes                          |

|                                                                                                                    |               |    |                     |     |
|--------------------------------------------------------------------------------------------------------------------|---------------|----|---------------------|-----|
| 201-002                                                                                                            | C3D22         | CR | Neutrophil-enriched | yes |
| 201-002                                                                                                            | C4D1          | CR | Neutrophil-enriched | yes |
| -                                                                                                                  | -             | -  | -                   | -   |
| 201-006                                                                                                            | pre-treatment | NA | Neutrophil-enriched | yes |
| 201-006                                                                                                            | C1D15         | CR | Neutrophil-enriched | yes |
| -                                                                                                                  | -             | -  | -                   | -   |
| 201-023                                                                                                            | C1D8          | NA | CD14+ monocytes     | yes |
| 201-023                                                                                                            | C1D8          | NA | CD16+ neutrophils   | yes |
| 201-023                                                                                                            | C6D1          | NA | CD14+ monocytes     | yes |
| 201-023                                                                                                            | C6D1          | NA | CD16+ neutrophils   | yes |
| 201-023                                                                                                            | C8D15         | CR | CD14+ monocytes     | Yes |
| ANC = absolute neutrophil count; CR = complete remission; m <i>IDH2</i> = mutant <i>isocitrate dehydrogenase 2</i> |               |    |                     |     |

Mature neutrophils and monocytes isolated from longitudinal peripheral blood samples of enasidenib-treated patients were analyzed for the presence of *IDH2* mutation (R140Q or in sample 201-013: R172K) by TaqMan SNP genotyping. Samples were CD14+ monocytes and CD16+ neutrophils. *CnDn* denotes the cycle number and the day of the cycle the sample was obtained. Response assessments were made on D1 of each cycle, except for an additional early assessment at C1D15. Blood samples taken between response assessments are assigned the response at the previous cycle. NA denotes time points when response assessment was not available.

**Table S5:** Association of Known Somatic Mutations Identified by FoundationOne® Heme Panel with Response to Enasidenib.

| <b>Gene</b> | <b>R140<br/>(n)</b> | <b>R172<br/>(n)</b> | <b>ORR</b> | <b>ORR,<br/>OR</b> | <b>ORR,<br/>p-value</b> | <b>CR</b> | <b>CR,<br/>OR</b> | <b>CR,<br/>p-<br/>value</b> |
|-------------|---------------------|---------------------|------------|--------------------|-------------------------|-----------|-------------------|-----------------------------|
| NRAS        | 12                  | 5                   | 0.188      | 0.275              | 0.0604                  | 0.063     | 0.102             | 0.0114                      |
| PTPN11      | 5                   | 1                   | 0.000      | 0.114              | 0.0708                  | 0.000     | 0.151             | 0.1598                      |
| RUNX1       | 21                  | 3                   | 0.261      | 0.418              | 0.1110                  | 0.217     | 0.439             | 0.1609                      |
| JAK2        | 3                   | 1                   | 0.000      | 0.141              | 0.1351                  | 0.000     | 0.186             | 0.2976                      |
| FLT3        | 11                  | 1                   | 0.200      | 0.312              | 0.1901                  | 0.200     | 0.418             | 0.3300                      |
| SRSF2       | 45                  | 0                   | 0.341      | 0.610              | 0.2067                  | 0.293     | 0.655             | 0.3498                      |
| ASXL1       | 21                  | 6                   | 0.385      | 0.799              | 0.6703                  | 0.269     | 0.598             | 0.3750                      |
| CEBPA       | 6                   | 0                   | 0.167      | 0.254              | 0.2378                  | 0.167     | 0.339             | 0.4181                      |
| STAG2       | 10                  | 2                   | 0.455      | 1.111              | 0.9999                  | 0.455     | 1.500             | 0.5307                      |
| GATA2       | 2                   | 0                   | 0.000      | 0.507              | 0.2587                  | 0.000     | 0.342             | 0.5344                      |
| BCORL1      | 2                   | 0                   | 0.000      | 0.574              | 0.5067                  | 0.000     | 0.342             | 0.5344                      |
| TP53        | 3                   | 0                   | 0.000      | 0.259              | 0.5067                  | 0.000     | 0.342             | 0.5344                      |
| ETV6        | 1                   | 1                   | 0.500      | 1.329              | 0.9999                  | 0.000     | 0.342             | 0.5344                      |
| NPM1        | 15                  | 0                   | 0.417      | 0.942              | 0.9999                  | 0.250     | 0.561             | 0.5388                      |
| SETBP1      | 3                   | 0                   | 0.000      | 0.183              | 0.2601                  | 0.000     | 0.242             | 0.5544                      |
| SF3B1       | 2                   | 1                   | 0.000      | 0.183              | 0.2601                  | 0.000     | 0.242             | 0.5544                      |
| EZH2        | 5                   | 0                   | 0.200      | 0.321              | 0.3920                  | 0.200     | 0.542             | 0.6539                      |
| KRAS        | 3                   | 2                   | 0.400      | 0.879              | 0.9999                  | 0.200     | 0.428             | 0.6539                      |
| KMT2A       | 12                  | 2                   | 0.357      | 0.716              | 0.7789                  | 0.286     | 0.679             | 0.7724                      |

|                                                                       |    |    |       |       |        |       |       |        |
|-----------------------------------------------------------------------|----|----|-------|-------|--------|-------|-------|--------|
| U2AF1                                                                 | 1  | 1  | 1.000 | 6.799 | 0.1837 | 0.500 | 1.763 | 0.9999 |
| DNMT3A                                                                | 28 | 14 | 0.513 | 1.548 | 0.2689 | 0.359 | 0.974 | 0.9999 |
| ATM                                                                   | 3  | 0  | 0.500 | 1.164 | 0.9999 | 0.500 | 1.763 | 0.9999 |
| BCOR                                                                  | 10 | 5  | 0.429 | 0.996 | 0.9999 | 0.357 | 0.970 | 0.9999 |
| CBL                                                                   | 3  | 0  | 0.333 | 0.657 | 0.9999 | 0.333 | 0.873 | 0.9999 |
| CUX1                                                                  | 2  | 0  | 0.500 | 1.329 | 0.9999 | 0.500 | 1.763 | 0.9999 |
| IDH1                                                                  | 4  | 0  | 0.500 | 1.333 | 0.9999 | 0.250 | 0.576 | 0.9999 |
| PHF6                                                                  | 6  | 0  | 0.500 | 1.338 | 0.9999 | 0.333 | 0.871 | 0.9999 |
| TET2                                                                  | 5  | 0  | 0.333 | 0.657 | 0.9999 | 0.333 | 0.873 | 0.9999 |
| WT1                                                                   | 2  | 1  | 0.333 | 0.657 | 0.9999 | 0.333 | 0.873 | 0.9999 |
| ZRSR2                                                                 | 4  | 1  | 0.400 | 0.879 | 0.9999 | 0.400 | 1.172 | 0.9999 |
| CR = complete remission; ORR = overall response rate; OR = odds ratio |    |    |       |       |        |       |       |        |

Genes with known and likely somatic mutations identified by FoundationOne® Heme panel found in 2 or more patient samples sorted by p-value (Fisher's Exact test on contingency table). Overall response rates include CR, CRi, CRp, MLFS, or PR. CR rates include CR, CRi, CRp and MLFS.
